# Supplementary material
Source: Research Square preprint supplement (doi:10.21203/rs.3.rs-9694606/v1)
Supplement: Supplementary file 1 [file 0d6e735939062184db3cfceb.docx]

Table 1. Twenty one different combinations of organic and inorganic P sources used in the study at the required rate of 90 kg P ha-1 (Factor A).

| P sources | | Inorganic P sources | | Organic P sources | | | |
| --- | --- | --- | --- | --- | --- | --- | --- |
| P-Sources Treatments | | SSP | RP | SM | CM | LR | NLR |
|  | 1 | 90 | 0 | 0 | 0 | 0 | 0 |
|  | 2 | 0 | 90 | 0 | 0 | 0 | 0 |
| Sole P-sources | 3 | 0 | 0 | 90 | 0 | 0 | 0 |
|  | 4 | 0 | 0 | 0 | 90 | 0 | 0 |
|  | 5 | 0 | 0 | 0 | 0 | 90 | 0 |
|  | 6 | 0 | 0 | 0 | 0 | 0 | 90 |
| Inorganic + Organic P sources | 7 | 45 | 45 | 0 | 0 | 0 | 0 |
| 8 | 45 | 0 | 45 | 0 | 0 | 0 |
| 9 | 45 | 0 | 0 | 45 | 0 | 0 |
| 10 | 45 | 0 | 0 | 0 | 45 | 0 |
| 11 | 45 | 0 | 0 | 0 | 0 | 45 |
| 12 | 0 | 45 | 45 | 0 | 0 | 0 |
| 13 | 0 | 45 | 0 | 45 | 0 | 0 |
| 14 | 0 | 45 | 0 | 0 | 45 | 0 |
| 15 | 0 | 45 | 0 | 0 | 0 | 45 |
| 16 | 0 | 0 | 45 | 45 | 0 | 0 |
| Animal + plant P sources | 17 | 0 | 0 | 45 | 0 | 45 | 0 |
| 18 | 0 | 0 | 45 | 0 | 0 | 45 |
| 19 | 0 | 0 | 0 | 45 | 45 | 0 |
| 20 | 0 | 0 | 0 | 45 | 0 | 45 |
| 21 | 0 | 0 | 0 | 0 | 45 | 45 |

**Note**: One control treatment (no P and no BF was applied) was also included in each trial for comparison.

Where SSP stands for single supper phosphate, RP stand for rock phosphate, CM stand for cattle manure, SM stand for sheep manure, LR stand for legumes residues, and NLR stand for non-legume residues, P stand for P and BF stand for BF.

## Table 2a. Soil pH of wheat in relation to P sources and biofertilizers.

| P sources (PS) | Years | | Mean |  |
| --- | --- | --- | --- | --- |
| 2020-21 | 2021-22 |  |
| Single super phosphate (SSP) | 7.99 | 8.03 | 8.01 | a |
| Rock phosphate (RP) | 7.93 | 8.02 | 7.97 | a |
| Sheep manure (SM) | 7.97 | 7.85 | 7.91 | b |
| Cattle manure (CM) | 7.83 | 7.79 | 7.81 | cd |
| Legumes residues (LR) | 7.76 | 7.73 | 7.74 | d |
| Non-legume residues (NLR) | 7.76 | 7.73 | 7.74 | d |
| SSP +RP | 7.93 | 7.90 | 7.91 | b |
| SSP+ SM | 7.94 | 7.87 | 7.90 | bc |
| SSP+CM | 7.90 | 7.86 | 7.88 | bc |
| SSP+LR | 7.87 | 7.82 | 7.85 | c |
| SSP+NLR | 7.89 | 7.84 | 7.86 | bc |
| RP+SM | 7.91 | 7.88 | 7.89 | bc |
| RP+CM | 7.88 | 7.86 | 7.87 | bc |
| RP+LR | 7.85 | 7.82 | 7.83 | cd |
| RP+NLR | 7.84 | 7.81 | 7.83 | cd |
| SM+CM | 7.82 | 7.81 | 7.82 | cd |
| SM+LR | 7.78 | 7.79 | 7.79 | d |
| SM+NLR | 7.83 | 7.78 | 7.81 | cd |
| CM+LR | 7.76 | 7.75 | 7.76 | d |
| CM+NLR | 7.77 | 7.76 | 7.76 | d |
| LR+NLR | 7.75 | 7.72 | 7.74 | d |
| LSD (0.05) for PS | 0.11 | 0.07 | 0.06 |  |
| BF |  |  |  |  |
| PSB | 7.84 | 7.82 | 7.83 |  |
| Bioaab | 7.86 | 7.84 | 7.85 |  |
| LSD (0.05) for BF | ns | ns | ns |  |
| Years |  |  |  |  |
| 2020-21 |  |  | 7.85 |  |
| 2021-22 |  |  | 7.83 |  |
| Significance (at 5% probability) |  |  | ns |  |

Significant differences exist at a 5% probability among means within the same category that are followed by different alphabets.

*, ** used for 1 & 5% significance level and “ns” for non-significance.

## Table 2b. Planned mean comparison of soil pH of wheat in relation to P sources and biofertilizers.

| Planned mean comparisons | | | | | |
| --- | --- | --- | --- | --- | --- |
| Control vs. Rest | | Years | | | Mean |
| 2020-21 | | 2021-22 |
| Control (no P and no BF applied) | | 8.27 | | 8.33 | 8.30 a |
| Rest (treated plots) | | 7.85 | | 7.83 | 7.8 b4 |
| Significance (at 5% probability) | | ** | | ** | ** |
| Sole PS vs PiM | | | |  |  |
| Sole PS | | 7.87 | | 7.86 | 7.87 a |
| P in mixture (PiM) | | 7.85 | | 7.82 | 7.83 b |
| Significance (at 5% probability) | | ns | | ** | ** |
| IPS vs APS | | | | |  |
| Inorganic-P sources (IPS) | | 7.96 | | 8.03 | 7.99 a |
| Animal P sources (APS) | | 7.90 | | 7.82 | 7.86 b |
| Significance (at 5% probability) | | ns | | ** | ** |
| IPS vs PPS | | | | |  |
| Inorganic-P sources (IPS) | | 7.96 | | 8.03 | 7.99 a |
| Plant P sources (PPS) | | 7.76 | | 7.73 | 7.74 b |
| Significance (at 5% probability) | | ** | | ** | ** |
| APS vs PPS | | | |  |  |
| Animal P sources (APS) | | 7.90 | | 7.82 | 7.86 a |
| Plant P sources (PPS) | | 7.76 | | 7.73 | 7.74 b |
| Significance (at 5% probability) | | ** | | ** | ** |
| IPS vs OPS | | | | | |
| Inorganic-P sources (IPS) | | 7.96 | | 8.03 | 7.99 a |
| Organic P sources (OPS) | | 7.83 | | 7.77 | 7.80 b |
| Significance (at 5% probability) | | ** | | ** | ** |
| Interactions | |  | |  |  |
| PS × BF | ns | | Y × IPS vs APS | | ** |
| Y × Control vs. Rest | ns | | Y × IPS vs PPS | | * |
| Y × Sole PS vs PiM | ** | | Y × APS vs PPS | | ns |
| Y × PS | ns | | Y × IPS vs OPS | | ** |
| Y × PPS | * | | Y × BF | | ns |
| Y × PiM | ns | | Y × PS × BF | | ns |

Note = Significant differences exist at a 5% probability among means within the same category that are followed by different alphabets.

*, ** used for 1 & 5% significance level and “ns” for non-significance.

IPS= inorganic P sources

Sole PS= sole P sources

APS= animal P sources

PPS=plant P sources

PS=P sources

PiM=P in mixture

## Table 3a. Soil organic matter (%) of wheat in relation to P sources and biofertilizers.

| P sources (PS) | Years | | Mean |  |
| --- | --- | --- | --- | --- |
| 2020-21 | 2021-22 |  |
| Single super phosphate (SSP) | 0.75 | 0.68 | 0.71 | m |
| Rock phosphate (RP) | 0.75 | 0.70 | 0.73 | m |
| Sheep manure (SM) | 1.17 | 1.24 | 1.20 | e |
| Cattle manure (CM) | 1.23 | 1.28 | 1.26 | d |
| Legumes residues (LR) | 1.27 | 1.35 | 1.31 | c |
| Non-legume residues (NLR) | 1.40 | 1.38 | 1.39 | ab |
| SSP +RP | 0.74 | 0.83 | 0.78 | kl |
| SSP+ SM | 0.94 | 1.06 | 1.00 | kl |
| SSP+CM | 0.97 | 1.08 | 1.03 | jk |
| SSP+LR | 1.00 | 1.11 | 1.06 | jk |
| SSP+NLR | 1.06 | 1.19 | 1.13 | f |
| RP+SM | 0.94 | 0.98 | 0.96 | l |
| RP+CM | 0.97 | 1.08 | 1.03 | jk |
| RP+LR | 0.99 | 1.11 | 1.05 | jk |
| RP+NLR | 1.06 | 1.19 | 1.13 | f |
| SM+CM | 1.18 | 1.31 | 1.24 | d |
| SM+LR | 1.20 | 1.33 | 1.27 | d |
| SM+NLR | 1.27 | 1.41 | 1.34 | bc |
| CM+LR | 1.23 | 1.36 | 1.30 | de |
| CM+NLR | 1.30 | 1.45 | 1.37 | b |
| LR+NLR | 1.34 | 1.48 | 1.41 | a |
| LSD (0.05) for PS | 0.05 | 0.06 | 0.04 |  |
| BF |  |  |  |  |
| PSB | 1.07 | 1.17 | 1.12 |  |
| Bioaab | 1.10 | 1.17 | 1.14 |  |
| LSD (0.05) for BF | 0.0 | ns | 0.0 |  |
| Years |  |  |  |  |
| 2020-21 |  |  | 1.08 |  |
| 2021-22 |  |  | 1.17 |  |
| Significance (at 5% probability) |  |  | ** |  |

Significant differences exist at a 5% probability among means within the same category that are followed by different alphabets.

*, ** used for 1 & 5% significance level and “ns” for non-significance.

## Table 3b. Planned mean comparison of soil organic matter (%) of wheat in relation to P sources and biofertilizers.

| Planned mean comparisons | | | | |
| --- | --- | --- | --- | --- |
| Control vs. Rest | Years | | | Mean |
| 2020-21 | 2021-22 | |
| Control (no P and no BF applied) | 0.65 | 0.55 | | 0.60 |
| Rest (treated plots) | 1.08 | 1.17 | | 1.13 |
| Significance (at 5% probability) | ** | ** | | ** |
| Sole PS vs PiM | |  | |  |
| Sole PS | 1.10 | 1.11 | | 1.10 |
| P in mixture (PiM) | 1.08 | 1.20 | | 1.14 |
| Significance (at 5% probability) | ns | ** | | ** |
| IPS vs APS | | | |  |
| Inorganic-P sources (IPS) | 0.75 | | 0.69 | 0.72 |
| Animal P sources (APS) | 1.20 | | 1.26 | 1.23 |
| Significance (at 5% probability) | ** | | ** | ** |
| IPS vs PPS | | | |  |
| Inorganic-P sources (IPS) | 0.75 | | 0.69 | 0.72 |
| Plant P sources (PPS) | 1.33 | | 1.37 | 1.35 |
| Significance (at 5% probability) | ** | | ** | ** |
| APS vs PPS | | |  |  |
| Animal P sources (APS) | 1.20 | | 1.26 | 1.23 |
| Plant P sources (PPS) | 1.33 | | 1.37 | 1.35 |
| Significance (at 5% probability) | ** | | ** | ** |
| IPS vs OPS | | | | |
| Inorganic-P sources (IPS) | 0.75 | | 0.69 | 0.72 |
| Organic P sources (OPS) | 1.27 | | 1.31 | 1.29 |
| Significance (at 5% probability) | ** | | ** | ** |
| Interactions |  | |  |  |
| PS × BF | ns | | Y × IPS vs APS | ** |
| Y × Control vs. Rest | ** | | Y × IPS vs PPS | ** |
| Y × Sole PS vs PiM | ** | | Y × APS vs PPS | ns |
| Y × PS | ** | | Y × IPS vs OPS | ** |
| Y × PPS | ** | | Y × BF | ns |
| Y × PiM | ns | | Y × PS × BF | ns |

Note = Significant differences exist at a 5% probability among means within the same category that are followed by different alphabets.

*, ** used for 1 & 5% significance level and “ns” for non-significance.

IPS= inorganic P sources

Sole PS= sole P sources

APS= animal P sources

PPS=plant P sources

PS=P sources

PiM=P in mixture

## Table 4a. Soil microbial population (cfu8) of wheat in relation to P sources and biofertilizers.

| P sources (PS) | Years | | Mean |  |
| --- | --- | --- | --- | --- |
|  | 2020-21 | 2021-22 |  |
| Single super phosphate (SSP) | 2.8 | 3.4 | 3.1 | g |
| Rock phosphate (RP) | 2.8 | 4.1 | 3.4 | f |
| Sheep manure (SM) | 4.4 | 5.4 | 4.9 | bc |
| Cattle manure (CM) | 5.0 | 6.1 | 5.5 | a |
| Legumes residues (LR) | 4.3 | 5.6 | 4.9 | bc |
| Non-legume residues (NLR) | 4.6 | 5.9 | 5.3 | ab |
| SSP +RP | 3.6 | 4.9 | 4.2 | e |
| | SSP+ SM | | --- | | 3.6 | 4.9 | 4.2 | e |
| SSP+CM | 4.1 | 4.9 | 4.5 | d |
| SSP+LR | 3.8 | 5.1 | 4.4 | de |
| SSP+NLR | 3.9 | 5.2 | 4.5 | d |
| RP+SM | 3.7 | 5.0 | 4.3 | de |
| RP+CM | 3.9 | 5.2 | 4.5 | d |
| RP+LR | 3.6 | 4.9 | 4.2 | e |
| RP+NLR | 4.1 | 5.2 | 4.6 | de |
| SM+CM | 4.8 | 6.1 | 5.4 | a |
| SM+LR | 4.5 | 5.8 | 5.1 | b |
| SM+NLR | 4.7 | 6.0 | 5.3 | ab |
| CM+LR | 4.7 | 6.0 | 5.3 | ab |
| CM+NLR | 4.9 | 6.2 | 5.5 | a |
| LR+NLR | 4.1 | 5.4 | 4.8 | c |
| LSD (0.05) for PS | 0.4 | 0.6 | 0.3 |  |
| BF |  |  |  |  |
| PSB | 5.1 | 6.3 | 5.7 |  |
| Bioaab | 3.1 | 4.2 | 3.6 |  |
| LSD (0.05) for BF | 0.1 | 0.2 | 0.1 |  |
| Years |  |  |  |  |
| 2020-21 |  |  | 4.1 |  |
| 2021-22 |  |  | 5.3 |  |
| Significance (at 5% probability) |  |  | * |  |

Significant differences exist at a 5% probability among means within the same category that are followed by different alphabets.

*, ** used for 1 & 5% significance level and “ns” for non-significance.

## Table 4b. Planned mean comparison of soil microbial population (cfu8) of wheat in relation to P sources and biofertilizers.

| Planned mean comparisons | | | |
| --- | --- | --- | --- |
| Control vs. Rest | Years | | Mean |
| 2020-21 | 2021-22 |
| Control (no P and no BF applied) | 2.3 | 2.7 | 2.5 b |
| Rest (treated plots) | 4.1 | 5.3 | 4.7 a |
| Significance (at 5% probability) | ** | ** | ** |
| Sole PS vs PiM | |  |  |
| Sole PS | 4.0 | 5.1 | 4.5 b |
| P in mixture (PiM) | 4.1 | 5.4 | 4.7 a |
| Significance (at 5% probability) | * | ** | ** |
| IPS vs APS | | |  |
| Inorganic-P sources (IPS) | 2.8 | 3.7 | 3.3 b |
| Animal P sources (APS) | 4.7 | 5.7 | 5.2 a |
| Significance (at 5% probability) | ** | ** | ** |
| IPS vs PPS | | |  |
| Inorganic-P sources (IPS) | 2.8 | 3.7 | 3.3 b |
| Plant P sources (PPS) | 4.4 | 5.7 | 5.1 a |
| Significance (at 5% probability) | ** | ** | ** |
| APS vs PPS | |  |  |
| Animal P sources (APS) | 4.65 | 5.74 | 5.20 |
| Plant P sources (PPS) | 4.44 | 5.74 | 5.09 |
| Significance (at 5% probability) | ns | ns | ns |
| IPS vs OPS | | | |
| Inorganic-P sources (IPS) | 2.8 | 3.7 | 3.3 b |
| Organic P sources (OPS) | 4.5 | 5.7 | 5.1 a |
| Significance (at 5% probability) | ** | ** | ** |
| Interactions |  |  |  |
| PS × BF | ** | Y × IPS vs APS | ns |
| Y × Control vs. Rest | * | Y × IPS vs PPS | ns |
| Y × Sole PS vs PiM | ** | Y × APS vs PPS | ns |
| Y × PS | ns | Y × IPS vs OPS | ns |
| Y × PPS | ns | Y × BF | ns |
| Y × PiM | ns | Y × PS × BF | ns |

Note = Significant differences exist at a 5% probability among means within the same category that are followed by different alphabets.

*, ** used for 1 & 5% significance level and “ns” for non-significance.

IPS= inorganic P sources

Sole PS= sole P sources

APS= animal P sources

PPS=plant P sources

PS=P sources

PiM=P in mixture

## Table 5a. Soil P content (mg kg-1) of wheat in relation to P sources and biofertilizers.

| P sources (PS) | Years | | Mean |  |
| --- | --- | --- | --- | --- |
| 2020-21 | 2021-22 |  |
| Single super phosphate (SSP) | 4.13 | 4.17 | 4.15 | e |
| Rock phosphate (RP) | 4.00 | 3.94 | 3.97 | f |
| Sheep manure (SM) | 4.71 | 4.87 | 4.79 | a |
| Cattle manure (CM) | 4.71 | 4.78 | 4.75 | ab |
| Legumes residues (LR) | 4.69 | 4.76 | 4.72 | ab |
| Non-legume residues (NLR) | 4.13 | 4.09 | 4.11 | ef |
| SSP +RP | 3.92 | 3.89 | 3.90 | f |
| SSP+ SM | 4.27 | 4.35 | 4.31 | d |
| SSP+CM | 4.27 | 4.31 | 4.29 | de |
| SSP+LR | 4.26 | 4.30 | 4.28 | de |
| SSP+NLR | 3.98 | 3.96 | 3.97 | f |
| RP+SM | 4.35 | 4.47 | 4.41 | cd |
| RP+CM | 4.36 | 4.43 | 4.39 | cd |
| RP+LR | 4.34 | 4.41 | 4.38 | cd |
| RP+NLR | 4.06 | 4.08 | 4.07 | ef |
| SM+CM | 4.69 | 4.86 | 4.78 | ab |
| SM+LR | 4.68 | 4.85 | 4.77 | ab |
| SM+NLR | 4.40 | 4.51 | 4.46 | c |
| CM+LR | 4.61 | 4.67 | 4.64 | b |
| CM+NLR | 4.47 | 4.41 | 4.44 | cd |
| LR+NLR | 4.41 | 4.43 | 4.42 | cd |
| LSD (0.05) for PS | 0.22 | 0.21 | 0.15 |  |
| BF |  |  |  |  |
| PSB | 4.45 | 4.48 | 4.47 |  |
| Bioaab | 4.26 | 4.33 | 4.30 |  |
| LSD (0.05) for BF | 0.07 | 0.06 | 0.05 |  |
| Years |  |  |  |  |
| 2020-21 |  |  | 4.36 |  |
| 2021-22 |  |  | 4.41 |  |
| Significance (at 5% probability) |  |  | ns |  |

Significant differences exist at a 5% probability among means within the same category that are followed by different alphabets.

*, ** used for 1 & 5% significance level and “ns” for non-significance.

## Table 5b. Planned mean comparison of soil P (mg kg-1) of wheat in relation to P sources and biofertilizers.

| Planned mean comparisons | | | | |
| --- | --- | --- | --- | --- |
| Control vs. Rest | Years | | | Mean |
| 2020-21 | | 2021-22 |
| Control (no P and no BF applied) | 2.67 | | 2.30 | 2.49 b |
| Rest (treated plots) | 4.36 | | 4.41 | 4.38 a |
| Significance (at 5% probability) | ** | | ** | ** |
| Sole PS vs PiM | | |  |  |
| Sole PS | 4.39 | | 4.43 | 4.41 |
| P in mixture (PiM) | 4.34 | | 4.40 | 4.37 |
| Significance (at 5% probability) | ns | | ns | ns |
| IPS vs APS | | | |  |
| Inorganic-P sources (IPS) | 4.07 | | 4.05 | 4.06 b |
| Animal P sources (APS) | 4.71 | | 4.83 | 4.77 a |
| Significance (at 5% probability) | ** | | ** | ** |
| IPS vs PPS | | | |  |
| Inorganic-P sources (IPS) | 4.07 | | 4.05 | 4.06 b |
| Plant P sources (PPS) | 4.41 | | 4.43 | 4.42 a |
| Significance (at 5% probability) | ** | | ** | ** |
| APS vs PPS | | |  |  |
| Animal P sources (APS) | 4.71 | | 4.83 | 4.77 a |
| Plant P sources (PPS) | 4.41 | | 4.43 | 4.42 b |
| Significance (at 5% probability) | ** | | ** | ** |
| IPS vs OPS | | | | |
| Inorganic-P sources (IPS) | 4.07 | | 4.05 | 4.06 b |
| Organic P sources (OPS) | 4.56 | | 4.63 | 4.59 a |
| Significance (at 5% probability) | ** | | ** | ** |
| Interactions |  | |  |  |
| PS × BF | ** | Y × IPS vs APS | | ns |
| Y × Control vs. Rest | ** | Y × IPS vs PPS | | ns |
| Y × Sole PS vs PiM | ** | Y × APS vs PPS | | ns |
| Y × PS | ns | Y × IPS vs OPS | | ns |
| Y × PPS | ns | Y × BF | | ns |
| Y × PiM | ns | Y × PS × BF | | ns |

Note = Significant differences exist at a 5% probability among means within the same category that are followed by different alphabets.

*, ** used for 1 & 5% significance level and “ns” for non-significance.

IPS= inorganic P sources

Sole PS= sole P sources

APS= animal P sources

PPS=plant P sources

PS=P sources

PiM=P in mixture

## Table 6a. Grain P concentration (%) of wheat in relation to P sources and biofertilizers.

| P sources (PS) | Years | | Mean |  |
| --- | --- | --- | --- | --- |
| 2020-21 | 2021-22 |  |
| Single super phosphate (SSP) | 0.33 | 0.34 | 0.34 | c |
| Rock phosphate (RP) | 0.27 | 0.28 | 0.28 | i |
| Sheep manure (SM) | 0.31 | 0.33 | 0.32 | e |
| Cattle manure (CM) | 0.35 | 0.37 | 0.36 | a |
| Legumes residues (LR) | 0.31 | 0.33 | 0.32 | e |
| Non-legume residues (NLR) | 0.20 | 0.22 | 0.21 | l |
| SSP +RP | 0.30 | 0.32 | 0.31 | f |
| SSP+ SM | 0.32 | 0.34 | 0.33 | d |
| SSP+CM | 0.34 | 0.36 | 0.35 | b |
| SSP+LR | 0.32 | 0.33 | 0.33 | d |
| SSP+NLR | 0.26 | 0.28 | 0.27 | e |
| RP+SM | 0.29 | 0.31 | 0.30 | g |
| RP+CM | 0.31 | 0.32 | 0.32 | e |
| RP+LR | 0.29 | 0.31 | 0.30 | g |
| RP+NLR | 0.23 | 0.25 | 0.24 | c |
| SM+CM | 0.33 | 0.34 | 0.33 | d |
| SM+LR | 0.31 | 0.33 | 0.32 | e |
| SM+NLR | 0.26 | 0.28 | 0.27 | j |
| CM+LR | 0.33 | 0.34 | 0.34 | c |
| CM+NLR | 0.28 | 0.30 | 0.29 | h |
| LR+NLR | 0.25 | 0.27 | 0.26 | k |
| LSD (0.05) for PS | 0.01 | 0.01 | 0.01 |  |
| BF |  |  |  |  |
| PSB | 0.297 | 0.315 | 0.306 |  |
| Bioaab | 0.293 | 0.310 | 0.302 |  |
| LSD (0.05) for BF | 0.004 | 0.004 | 0.003 |  |
| Years |  |  |  |  |
| 2020-21 |  |  | 0.295 |  |
| 2021-22 |  |  | 0.312 |  |
| Significance (at 5% probability) |  |  | ns |  |

Significant differences exist at a 5% probability among means within the same category that are followed by different alphabets.

*, ** used for 1 & 5% significance level and “ns” for non-significance.

## Table 6b. Planned mean comparison of grain P concentration (%) of wheat in relation to P sources and biofertilizers.

| Planned mean comparisons | | | | |
| --- | --- | --- | --- | --- |
| Control vs. Rest | Years | | | Mean |
| 2020-21 | | 2021-22 |
| Control (no P and no BF applied) | 0.157 | | 0.147 | 0.152 |
| Rest (treated plots) | 0.295 | | 0.312 | 0.304 |
| Significance (at 5% probability) | ** | | ** | ** |
| Sole PS vs PiM | | |  |  |
| Sole PS | 0.295 | | 0.312 | 0.304 |
| P in mixture (PiM) | 0.295 | | 0.312 | 0.304 |
| Significance (at 5% probability) | ns | | ns | ns |
| IPS vs APS | | | |  |
| Inorganic-P sources (IPS) | 0.298 | 0.314 | | 0.306 |
| Animal P sources (APS) | 0.333 | 0.349 | | 0.341 |
| Significance (at 5% probability) | ** | ** | | ** |
| IPS vs PPS | | | |  |
| Inorganic-P sources (IPS) | 0.298 | 0.314 | | 0.306 |
| Plant P sources (PPS) | 0.254 | 0.273 | | 0.264 |
| Significance (at 5% probability) | ** | ** | | ** |
| APS vs PPS | |  | |  |
| Animal P sources (APS) | 0.333 | 0.349 | | 0.341 |
| Plant P sources (PPS) | 0.254 | 0.273 | | 0.264 |
| Significance (at 5% probability) | ** | ** | | ** |
| IPS vs OPS | | | | |
| Inorganic-P sources (IPS) | 0.298 | 0.314 | | 0.306 |
| Organic P sources (OPS) | 0.293 | 0.311 | | 0.302 |
| Significance (at 5% probability) | ns | ns | | ns |
| Interactions |  |  | |  |
| PS × BF | ** | Y × IPS vs APS | | ns |
| Y × Control vs. Rest | ** | Y × IPS vs PPS | | ns |
| Y × Sole PS vs PiM | ** | Y × APS vs PPS | | ns |
| Y × PS | ns | Y × IPS vs OPS | | ns |
| Y × PPS | ns | Y × BF | | ns |
| Y × PiM | ns | Y × PS × BF | | ns |

Note = Significant differences exist at a 5% probability among means within the same category that are followed by different alphabets.

*, ** used for 1 & 5% significance level and “ns” for non-significance.

IPS= inorganic P sources

Sole PS= sole P sources

APS= animal P sources

PPS=plant P sources

PS=P sources

PiM=P in mixture

## Table 7a. Straw P concentration (%) of wheat in relation to P sources and biofertilizers.

| P sources (PS) | Years | | Mean |  |
| --- | --- | --- | --- | --- |
| 2020-21 | 2021-22 |  |
| Single super phosphate (SSP) | 0.14 | 0.14 | 0.14 | a |
| Rock phosphate (RP) | 0.14 | 0.13 | 0.14 | a |
| Sheep manure (SM) | 0.15 | 0.14 | 0.14 | a |
| Cattle manure (CM) | 0.14 | 0.14 | 0.14 | a |
| Legumes residues (LR) | 0.14 | 0.14 | 0.14 | a |
| Non-legume residues (NLR) | 0.12 | 0.12 | 0.12 | c |
| SSP +RP | 0.13 | 0.13 | 0.13 | b |
| SSP+ SM | 0.14 | 0.13 | 0.14 | a |
| SSP+CM | 0.14 | 0.12 | 0.13 | b |
| SSP+LR | 0.14 | 0.13 | 0.14 | a |
| SSP+NLR | 0.11 | 0.12 | 0.12 | c |
| RP+SM | 0.12 | 0.13 | 0.13 | b |
| RP+CM | 0.12 | 0.12 | 0.12 | c |
| RP+LR | 0.12 | 0.13 | 0.13 | b |
| RP+NLR | 0.13 | 0.13 | 0.13 | b |
| SM+CM | 0.12 | 0.13 | 0.12 | c |
| SM+LR | 0.12 | 0.13 | 0.12 | c |
| SM+NLR | 0.11 | 0.12 | 0.11 | d |
| CM+LR | 0.13 | 0.13 | 0.13 | b |
| CM+NLR | 0.11 | 0.12 | 0.11 | d |
| LR+NLR | 0.11 | 0.12 | 0.11 | d |
| LSD (0.05) for PS | 0.01 | 0.01 | 0.01 |  |
| BF |  |  |  |  |
| PSB | 0.13 | 0.13 | 0.13 | a |
| Bioaab | 0.12 | 0.13 | 0.12 | b |
| LSD (0.05) for BF | 0.00 | 0.00 | 0.00 |  |
| Years |  |  |  |  |
| 2020-21 |  |  | 0.13 |  |
| 2021-22 |  |  | 0.13 |  |
| Significance (at 5% probability) |  |  | ns |  |

Significant differences exist at a 5% probability among means within the same category that are followed by different alphabets.

*, ** used for 1 & 5% significance level and “ns” for non-significance.

## Table 7b. Planned mean comparison of straw P concentration (%) of wheat in relation to P sources and biofertilizers.

| Planned mean comparisons | | | | |
| --- | --- | --- | --- | --- |
| Control vs. Rest | Years | | | Mean |
| 2020-21 | | 2021-22 |
| Control (no P and no BF applied) | 0.10 | | 0.10 | 0.10 |
| Rest (treated plots) | 0.13 | | 0.13 | 0.13 |
| Significance (at 5% probability) | ** | | ** | ** |
| Sole PS vs PiM | | |  |  |
| Sole PS | 0.14 | | 0.14 | 0.14 |
| P in mixture (PiM) | 0.12 | | 0.13 | 0.12 |
| Significance (at 5% probability) | ** | | ** | ** |
| IPS vs APS | | | |  |
| Inorganic-P sources (IPS) | 0.14 | | 0.14 | 0.14 |
| Animal P sources (APS) | 0.15 | | 0.14 | 0.14 |
| Significance (at 5% probability) | ns | | ns | ns |
| IPS vs PPS | | | |  |
| Inorganic-P sources (IPS) | 0.14 | | 0.14 | 0.14 |
| Plant P sources (PPS) | 0.13 | | 0.13 | 0.13 |
| Significance (at 5% probability) | * | | ns | * |
| APS vs PPS | | |  |  |
| Animal P sources (APS) | 0.15 | | 0.14 | 0.14 |
| Plant P sources (PPS) | 0.13 | | 0.13 | 0.13 |
| Significance (at 5% probability) | ** | | ns | ** |
| IPS vs OPS | | | | |
| Inorganic-P sources (IPS) | 0.14 | | 0.14 | 0.14 |
| Organic P sources (OPS) | 0.14 | | 0.14 | 0.14 |
| Significance (at 5% probability) | ns | | ns | ns |
| Interactions |  |  | |  |
| PS × BF | * | Y × IPS vs APS | | ns |
| Y × Control vs. Rest | ns | Y × IPS vs PPS | | ns |
| Y × Sole PS vs PiM | ** | Y × APS vs PPS | | ns |
| Y × PS | ns | Y × IPS vs OPS | | ns |
| Y × PPS | ns | Y × BF | | ns |
| Y × PiM | ns | Y × PS × BF | | ns |

Note = Significant differences exist at a 5% probability among means within the same category that are followed by different alphabets.

*, ** used for 1 & 5% significance level and “ns” for non-significance.

IPS= inorganic P sources

Sole PS= sole P sources

APS= animal P sources

PPS=plant P sources

PS=P sources

PiM=P in mixture

## Table 8a. Straw P uptake (kg ha-1) of wheat in relation to P sources and biofertilizers.

| P sources (PS) | Years | | Mean |  |
| --- | --- | --- | --- | --- |
| 2020-21 | 2021-22 |  |
| Single super phosphate (SSP) | 7.8 | 8.0 | 7.9 | ab |
| Rock phosphate (RP) | 7.8 | 7.7 | 7.7 | ab |
| Sheep manure (SM) | 8.2 | 7.9 | 8.0 | a |
| Cattle manure (CM) | 8.3 | 7.8 | 8.1 | a |
| Legumes residues (LR) | 7.7 | 7.7 | 7.7 | ab |
| Non-legume residues (NLR) | 6.8 | 6.9 | 6.9 | cd |
| SSP +RP | 7.6 | 7.6 | 7.6 | ab |
| SSP+ SM | 7.1 | 7.4 | 7.2 | b |
| SSP+CM | 7.3 | 7.1 | 7.2 | b |
| SSP+LR | 8.1 | 7.5 | 7.8 | ab |
| SSP+NLR | 6.1 | 7.2 | 6.6 | cd |
| RP+SM | 7.0 | 7.4 | 7.2 | ab |
| RP+CM | 6.7 | 7.1 | 6.9 | c |
| RP+LR | 7.0 | 7.3 | 7.2 | bc |
| RP+NLR | 7.1 | 7.4 | 7.3 | bc |
| SM+CM | 6.7 | 7.3 | 7.0 | bc |
| SM+LR | 6.8 | 7.3 | 7.0 | bc |
| SM+NLR | 5.8 | 6.8 | 6.3 | d |
| CM+LR | 7.3 | 7.2 | 7.3 | bc |
| CM+NLR | 6.1 | 6.8 | 6.5 | cd |
| LR+NLR | 6.0 | 6.7 | 6.3 | d |
| LSD (0.05) for PS | 0.8 | ns | 0.6 |  |
| BF |  |  |  |  |
| PSB | 7.4 | 7.6 | 7.5 |  |
| Bioaab | 6.8 | 7.1 | 6.9 |  |
| LSD (0.05) for BF | 0.2 | 0.3 | 0.2 |  |
| Years |  |  |  |  |
| 2020-21 |  |  | 7.1 |  |
| 2021-22 |  |  | 7.3 |  |
| Significance (at 5% probability) |  |  | ns |  |

Significant differences exist at a 5% probability among means within the same category that are followed by different alphabets.

*, ** used for 1 & 5% significance level and “ns” for non-significance.

## Table 8b. Planned mean comparison of straw P uptake (kg ha-1) of wheat in relation to P sources and biofertilizers.

| Planned mean comparisons | | | | |
| --- | --- | --- | --- | --- |
| Control vs. Rest | Years | | | Mean |
| 2020-21 | | 2021-22 |
| Control (no P and no BF applied) | 5.4 | | 5.5 | 5.5 b |
| Rest (treated plots) | 7.1 | | 7.3 | 7.2 a |
| Significance (at 5% probability) | ** | | ** | ** |
| Sole PS vs PiM | | |  |  |
| Sole PS | 7.8 | | 7.7 | 7.7 a |
| P in mixture (PiM) | 6.8 | | 7.2 | 7.0 b |
| Significance (at 5% probability) | ** | | ** | ** |
| IPS vs APS | | | |  |
| Inorganic-P sources (IPS) | 7.8 | 7.8 | | 7.8 |
| Animal P sources (APS) | 8.3 | 7.8 | | 8.1 |
| Significance (at 5% probability) | ns | ns | | ns |
| IPS vs PPS | | | |  |
| Inorganic-P sources (IPS) | 7.8 | 7.8 | | 7.8 a |
| Plant P sources (PPS) | 7.3 | 7.3 | | 7.3 b |
| Significance (at 5% probability) | ns | ns | | * |
| APS vs PPS | |  | |  |
| Animal P sources (APS) | 8.3 | 7.8 | | 8.1 a |
| Plant P sources (PPS) | 7.3 | 7.3 | | 7.3 b |
| Significance (at 5% probability) | ** | ns | | ** |
| IPS vs OPS | | | | |
| Inorganic-P sources (IPS) | 7.8 | 7.8 | | 7.8 |
| Organic P sources (OPS) | 7.8 | 7.6 | | 7.7 |
| Significance (at 5% probability) | ns | ns | | ns |
| Interactions |  |  | |  |
| PS × BF | * | Y × IPS vs APS | | ns |
| Y × Control vs. Rest | ns | Y × IPS vs PPS | | ns |
| Y × Sole PS vs PiM | ** | Y × APS vs PPS | | ns |
| Y × PS | ns | Y × IPS vs OPS | | ns |
| Y × PPS | ns | Y × BF | | ns |
| Y × PiM | ns | Y × PS × BF | | ns |

Note = Significant differences exist at a 5% probability among means within the same category that are followed by different alphabets.

*, ** used for 1 & 5% significance level and “ns” for non-significance.

IPS= inorganic P sources

Sole PS= sole P sources

APS= animal P sources

PPS=plant P sources

PS=P sources

PiM=P in mixture

## Table 9a. Grain P uptake (kg ha-1) of wheat in relation to P sources and biofertilizers.

| P sources (PS) | Years | | Mean |  |
| --- | --- | --- | --- | --- |
| 2020-21 | 2021-22 |  |
| Single super phosphate (SSP) | 10.6 | 11.9 | 11.2 | bc |
| Rock phosphate (RP) | 7.8 | 9.1 | 8.4 | d |
| Sheep manure (SM) | 11.0 | 11.9 | 11.4 | e |
| Cattle manure (CM) | 13.3 | 14.3 | 13.8 | a |
| Legumes residues (LR) | 10.3 | 12.2 | 11.2 | e |
| Non-legume residues (NLR) | 5.4 | 6.2 | 5.8 | k |
| SSP +RP | 9.3 | 10.8 | 10.1 | g |
| SSP+ SM | 12.3 | 13.0 | 12.7 | c |
| SSP+CM | 13.1 | 13.7 | 13.4 | b |
| SSP+LR | 10.8 | 12.3 | 11.6 | de |
| SSP+NLR | 7.6 | 8.8 | 8.2 | e |
| RP+SM | 8.8 | 10.5 | 9.6 | h |
| RP+CM | 9.8 | 11.3 | 10.6 | f |
| RP+LR | 9.3 | 10.8 | 10.0 | cd |
| RP+NLR | 7.0 | 8.2 | 7.6 | j |
| SM+CM | 12.0 | 13.3 | 12.6 | c |
| SM+LR | 11.0 | 12.8 | 11.9 | d |
| SM+NLR | 8.1 | 9.5 | 8.8 | i |
| CM+LR | 12.1 | 13.3 | 12.7 | c |
| CM+NLR | 9.0 | 10.3 | 9.6 | h |
| LR+NLR | 8.1 | 9.1 | 8.6 | i |
| LSD (0.05) for PS | 0.5 | 0.7 | 0.4 |  |
| BF |  |  |  |  |
| PSB | 10.3 | 11.7 | 11.0 |  |
| Bioaab | 9.4 | 10.5 | 9.9 |  |
| LSD (0.05) for BF | 0.2 | 0.2 | 0.1 |  |
| Years |  |  |  |  |
| 2020-21 |  |  | 9.8 |  |
| 2021-22 |  |  | 11.1 |  |
| Significance (at 5% probability) |  |  | ** |  |

Significant differences exist at a 5% probability among means within the same category that are followed by different alphabets.

*, ** used for 1 & 5% significance level and “ns” for non-significance.

## Table 9b. Planned mean comparison of grain P uptake (kg ha-1) of wheat in relation to P sources and biofertilizers.

| Planned mean comparisons | | | | |
| --- | --- | --- | --- | --- |
| Control vs. Rest | Years | | | Mean |
| 2020-21 | | 2021-22 |
| Control (no P and no BF applied) | 3.6 | | 3.3 | 3.4 |
| Rest (treated plots) | 9.8 | | 11.1 | 10.5 |
| Significance (at 5% probability) | ** | | ** | ** |
| Sole PS vs PiM | | |  |  |
| Sole PS | 9.7 | | 10.9 | 10.3 |
| P in mixture (PiM) | 9.9 | | 11.2 | 10.5 |
| Significance (at 5% probability) | ns | | * | ** |
| IPS vs APS | | | |  |
| Inorganic-P sources (IPS) | 9.2 | 10.5 | | 9.8 |
| Animal P sources (APS) | 12.1 | 13.1 | | 12.6 |
| Significance (at 5% probability) | ** | ** | | ** |
| IPS vs PPS | | | |  |
| Inorganic-P sources (IPS) | 9.2 | 10.5 | | 9.8 |
| Plant P sources (PPS) | 7.9 | 9.2 | | 8.5 |
| Significance (at 5% probability) | ** | ** | | ** |
| APS vs PPS | |  | |  |
| Animal P sources (APS) | 12.1 | 13.1 | | 12.6 |
| Plant P sources (PPS) | 7.9 | 9.2 | | 8.5 |
| Significance (at 5% probability) | ** | ** | | ** |
| IPS vs OPS | | | | |
| Inorganic-P sources (IPS) | 9.2 | 10.5 | | 9.8 |
| Organic P sources (OPS) | 10.0 | 11.1 | | 10.6 |
| Significance (at 5% probability) | ** | ** | | ** |
| Interactions |  |  | |  |
| PS × BF | ** | Y × IPS vs APS | | ns |
| Y × Control vs. Rest | ** | Y × IPS vs PPS | | ns |
| Y × Sole PS vs PiM | ** | Y × APS vs PPS | | ns |
| Y × PS | ns | Y × IPS vs OPS | | ns |
| Y × PPS | ns | Y × BF | | * |
| Y × PiM | ns | Y × PS × BF | | ns |

Note = Significant differences exist at a 5% probability among means within the same category that are followed by different alphabets.

*, ** used for 1 & 5% significance level and “ns” for non-significance.

IPS= inorganic P sources

Sole PS= sole P sources

APS= animal P sources

PPS=plant P sources

PS=P sources

PiM=P in mixture

PiM=P in mixture

## Table 10a. Total P uptake (kg ha-1) of wheat in relation to P sources and biofertilizers.

| P sources (PS) | Years | | Mean |  |
| --- | --- | --- | --- | --- |
| 2020-21 | 2021-22 |  |
| Single super phosphate (SSP) | 18.4 | 19.9 | 19.1 | d |
| Rock phosphate (RP) | 15.6 | 16.7 | 16.2 | ge |
| Sheep manure (SM) | 19.2 | 19.8 | 19.5 | c |
| Cattle manure (CM) | 21.6 | 22.1 | 21.8 | a |
| Legumes residues (LR) | 18.0 | 19.9 | 18.9 | d |
| Non-legume residues (NLR) | 12.3 | 13.1 | 12.7 | i |
| SSP +RP | 16.9 | 18.5 | 17.7 | e |
| SSP+ SM | 19.4 | 20.4 | 19.9 | c |
| SSP+CM | 20.4 | 20.8 | 20.6 | b |
| SSP+LR | 18.8 | 19.9 | 19.4 | cd |
| SSP+NLR | 13.7 | 16.0 | 14.8 | h |
| RP+SM | 15.8 | 17.9 | 16.8 | f |
| RP+CM | 16.5 | 18.5 | 17.5 | e |
| RP+LR | 16.3 | 18.1 | 17.2 | cd |
| RP+NLR | 14.1 | 15.7 | 14.9 | h |
| SM+CM | 18.7 | 20.5 | 19.6 | cd |
| SM+LR | 17.7 | 20.1 | 18.9 | d |
| SM+NLR | 13.9 | 16.2 | 15.1 | h |
| CM+LR | 19.5 | 20.5 | 20.0 | bc |
| CM+NLR | 15.1 | 17.1 | 16.1 | g |
| LR+NLR | 14.1 | 15.8 | 14.9 | h |
| LSD (0.05) for PS | 0.9 | 1.0 | 0.7 |  |
| BF |  |  |  |  |
| PSB | 17.7 | 19.3 | 18.5 |  |
| Bioaab | 16.2 | 17.6 | 16.9 |  |
| LSD (0.05) for BF | 0.3 | 0.3 | 0.2 |  |
| Years |  |  |  |  |
| 2020-21 |  |  | 16.9 |  |
| 2021-22 |  |  | 18.5 |  |
| Significance (at 5% probability) |  |  | * |  |

Significant differences exist at a 5% probability among means within the same category that are followed by different alphabets.

*, ** used for 1 & 5% significance level and “ns” for non-significance.

## Table 10b. Planned mean comparison of total P uptake (kg ha-1) of wheat in relation to P sources and biofertilizers.

| Planned mean comparisons | | | | | | | |
| --- | --- | --- | --- | --- | --- | --- | --- |
| Control vs. Rest | | Years | | | | Mean | |
| 2020-21 | | 2021-22 | |
| Control (no P and no BF applied) | | 9.0 | | 8.8 | | 8.9 b | |
| Rest (treated plots) | | 16.9 | | 18.5 | | 17.7 a | |
| Significance (at 5% probability) | | ** | | ** | | ** | |
| Sole PS vs PiM | | | |  | |  | |
| Sole PS | | 17.5 | | 18.6 | | 18.0 a | |
| P in mixture (PiM) | | 16.7 | | 18.4 | | 17.6 b | |
| Significance (at 5% probability) | | ** | | ns | | ** | |
| IPS vs APS | | | | | |  | |
| Inorganic-P sources (IPS) | | 17.0 | | 18.3 | | 17.6 b | |
| Animal P sources (APS) | | 20.4 | | 20.9 | | 20.7 a | |
| Significance (at 5% probability) | | ** | | ** | | ** | |
| IPS vs PPS | | | | | |  | |
| Inorganic-P sources (IPS) | | 17.0 | | 18.3 | | 17.6 a | |
| Plant P sources (PPS) | | 15.1 | | 16.5 | | 15.8 b | |
| Significance (at 5% probability) | | ** | | ** | | ** | |
| APS vs PPS | | | |  | |  | |
| Animal P sources (APS) | | 20.4 | | 20.9 | | 20.7 a | |
| Plant P sources (PPS) | | 15.1 | | 16.5 | | 15.8 b | |
| Significance (at 5% probability) | | ** | | ** | | ** | |
| IPS vs OPS | | | | | | | |
| Inorganic-P sources (IPS) | | 17.0 | | 18.3 | | 17.6 b | |
| Organic P sources (OPS) | | 17.8 | | 18.7 | | 18.2 a | |
| Significance (at 5% probability) | | ** | | ns | | ** | |
| Interactions | |  | |  | |  | |
| PS × BF | ** | | Y × IPS vs APS | | ns | |
| Y × Control vs. Rest | * | | Y × IPS vs PPS | | ns | |
| Y × Sole PS vs PiM | ** | | Y × APS vs PPS | | ns | |
| Y × PS | ns | | Y × IPS vs OPS | | ns | |
| Y × PPS | ns | | Y × BF | | ns | |
| Y × PiM | ns | | Y × PS × BF | | ns | |

Note = Significant differences exist at a 5% probability among means within the same category that are followed by different alphabets.

*, ** used for 1 & 5% significance level and “ns” for non-significance.

IPS= inorganic P sources

Sole PS= sole P sources

APS= animal P sources

PPS=plant P sources

PS=P sources

PiM=P in mixture

PiM=P in mixture

## Table 11a. P use efficiency (%) of wheat in relation to P sources and biofertilizers.

| P sources (PS) | Years | | Mean |  |
| --- | --- | --- | --- | --- |
| 2020-21 | 2021-22 |  |
| Single super phosphate (SSP) | 10.4 | 12.3 | 11.3 | cd |
| Rock phosphate (RP) | 7.3 | 8.8 | 8.1 | f |
| Sheep manure (SM) | 11.4 | 12.1 | 11.7 | cd |
| Cattle manure (CM) | 14.0 | 14.7 | 14.4 | a |
| Legumes residues (LR) | 10.0 | 12.3 | 11.1 | d |
| Non-legume residues (NLR) | 3.6 | 4.8 | 4.2 | i |
| SSP +RP | 8.7 | 10.7 | 9.7 | e |
| SSP+ SM | 11.8 | 12.9 | 12.4 | bc |
| SSP+CM | 12.7 | 13.3 | 13.0 | b |
| SSP+LR | 11.0 | 12.3 | 11.6 | cd |
| SSP+NLR | 5.3 | 7.9 | 6.6 | h |
| RP+SM | 7.5 | 10.1 | 8.8 | f |
| RP+CM | 8.3 | 10.7 | 9.5 | e |
| RP+LR | 8.1 | 10.3 | 9.2 | e |
| RP+NLR | 5.7 | 7.6 | 6.7 | h |
| SM+CM | 10.8 | 13.0 | 11.9 | c |
| SM+LR | 9.7 | 12.5 | 11.1 | d |
| SM+NLR | 5.5 | 8.2 | 6.8 | g |
| CM+LR | 11.7 | 13.0 | 12.3 | bc |
| CM+NLR | 6.8 | 9.2 | 8.0 | g |
| LR+NLR | 5.7 | 7.7 | 6.7 | h |
| LSD (0.05) for PS | 1.0 | 1.1 | 0.8 |  |
| BF |  |  |  |  |
| PSB | 9.8 | 11.6 | 10.7 |  |
| Bioaab | 8.0 | 9.8 | 8.9 |  |
| LSD (0.05) for BF | 0 | 0 | 0 |  |
| Years |  |  |  |  |
| 2020-21 |  |  | 9 |  |
| 2021-22 |  |  | 11 |  |
| Significance (at 5% probability) |  |  | ns |  |

Significant differences exist at a 5% probability among means within the same category that are followed by different alphabets.

*, ** used for 1 & 5% significance level and “ns” for non-significance.

## Table 11b. Planned mean comparison of P use efficiency (%) of wheat in relation to P sources and biofertilizers.

| Planned mean comparisons | | | | |
| --- | --- | --- | --- | --- |
| Control vs. Rest | Years | | | Mean |
| 2020-21 | | 2021-22 |
| Control (no P and no BF applied) | 0 | | 0 | 0 |
| Rest (treated plots) | 9 | | 11 | 10 |
| Significance (at 5% probability) | ** | | ** | ** |
| Sole PS vs PiM | | |  |  |
| Sole PS | 9.5 | | 10.8 | 10.1 |
| P in mixture (PiM) | 8.6 | | 10.6 | 9.6 |
| Significance (at 5% probability) | ** | | ns | ** |
| IPS vs APS | | | |  |
| Inorganic-P sources (IPS) | 8.9 | 10.5 | | 9.7 |
| Animal P sources (APS) | 12.7 | 13.4 | | 13.1 |
| Significance (at 5% probability) | ** | ** | | ** |
| IPS vs PPS | | | |  |
| Inorganic-P sources (IPS) | 8.9 | 10.5 | | 9.7 |
| Plant P sources (PPS) | 6.8 | 8.5 | | 7.7 |
| Significance (at 5% probability) | ** | ** | | ** |
| APS vs PPS | |  | |  |
| Animal P sources (APS) | 12.7 | 13.4 | | 13.1 |
| Plant P sources (PPS) | 6.8 | 8.5 | | 7.7 |
| Significance (at 5% probability) | ** | ** | | ** |
| IPS vs OPS | | | | |
| Inorganic-P sources (IPS) | 8.9 | 10.5 | | 9.7 |
| Organic P sources (OPS) | 9.8 | 11.0 | | 10.4 |
| Significance (at 5% probability) | ** | ns | | ** |
| Interactions |  |  | |  |
| PS × BF | ** | Y × IPS vs APS | | ns |
| Y × Control vs. Rest | * | Y × IPS vs PPS | | ns |
| Y × Sole PS vs PiM | ** | Y × APS vs PPS | | ns |
| Y × PS | ns | Y × IPS vs OPS | | ns |
| Y × PPS | ns | Y × BF | | ns |
| Y × PiM | ns | Y × PS × BF | | * |

Note = Significant differences exist at a 5% probability among means within the same category that are followed by different alphabets.

*, ** used for 1 & 5% significance level and “ns” for non-significance.

IPS= inorganic P sources

Sole PS= sole P sources

APS= animal P sources

PPS=plant P sources

PS=P sources

PiM=P in mixture

PiM=P in mixture

PiM=P in mixture

## Table 12a. Agronomic P use efficiency (kg kg-1) of wheat in relation to P sources and biofertilizers.

| P sources (PS) | Years | | Mean |  |
| --- | --- | --- | --- | --- |
| 2020-21 | 2021-22 |  |
| Single super phosphate (SSP) | 10.4 | 13.2 | 11.8 | cd |
| Rock phosphate (RP) | 6.9 | 10.5 | 8.7 | ef |
| Sheep manure (SM) | 13.9 | 14.9 | 14.4 | c |
| Cattle manure (CM) | 16.2 | 18.0 | 17.1 | ab |
| Legumes residues (LR) | 11.7 | 16.3 | 14.0 | bc |
| Non-legume residues (NLR) | 4.5 | 6.1 | 5.3 | g |
| SSP +RP | 9.3 | 12.8 | 11.0 | d |
| SSP+ SM | 17.4 | 17.5 | 17.5 | a |
| SSP+CM | 17.2 | 17.5 | 17.4 | a |
| SSP+LR | 12.2 | 15.8 | 14.0 | bc |
| SSP+NLR | 6.5 | 9.3 | 7.9 | f |
| RP+SM | 8.4 | 12.6 | 10.5 | d |
| RP+CM | 9.9 | 13.7 | 11.8 | cd |
| RP+LR | 10.5 | 14.0 | 12.2 | c |
| RP+NLR | 7.8 | 10.9 | 9.3 | e |
| SM+CM | 14.6 | 18.5 | 16.6 | ab |
| SM+LR | 14.1 | 18.1 | 16.1 | b |
| SM+NLR | 9.8 | 13.1 | 11.4 | cd |
| CM+LR | 15.3 | 18.2 | 16.7 | ab |
| CM+NLR | 10.5 | 13.1 | 11.8 | cd |
| LR+NLR | 10.0 | 12.1 | 11.1 | cd |
| LSD (0.05) for PS | 1.6 | 2.1 | 1.2 |  |
| BF |  |  |  |  |
| PSB | 12.8 | 15.9 | 14.3 |  |
| Bioaab | 9.8 | 12.3 | 11.1 |  |
| LSD (0.05) for BF | 0.5 | 0.6 | 0.4 |  |
| Years |  |  |  |  |
| 2020-21 |  |  | 11.3 |  |
| 2021-22 |  |  | 14.1 |  |
| Significance (at 5% probability) |  |  | ns |  |

Significant differences exist at a 5% probability among means within the same category that are followed by different alphabets.

*, ** used for 1 & 5% significance level and “ns” for non-significance.

## Table 12b. Planned mean comparison of agronomic P use efficiency (kg kg-1) of wheat in relation to P sources and biofertilizers.

| Planned mean comparisons | | | | |
| --- | --- | --- | --- | --- |
| Control vs. Rest | Years | | | Mean |
| 2020-21 | | 2021-22 |
| Control (no P and no BF applied) | 0.0 | | 0.0 | 0.0 |
| Rest (treated plots) | 11.3 | | 14.1 | 12.7 |
| Significance (at 5% probability) | ** | | ** | ** |
| Sole PS vs PiM | | |  |  |
| Sole PS | 10.6 | | 13.2 | 11.9 |
| P in mixture (PiM) | 11.6 | | 14.5 | 13.0 |
| Significance (at 5% probability) | ** | | ** | ** |
| IPS vs APS | | | |  |
| Inorganic-P sources (IPS) | 8.7 | 11.9 | | 10.3 |
| Animal P sources (APS) | 15.0 | 16.4 | | 15.7 |
| Significance (at 5% probability) | ** | ** | | ** |
| IPS vs PPS | | | |  |
| Inorganic-P sources (IPS) | 8.7 | 11.9 | | 10.3 |
| Plant P sources (PPS) | 8.1 | 11.2 | | 9.6 |
| Significance (at 5% probability) | ns | ns | | ns |
| APS vs PPS | |  | |  |
| Animal P sources (APS) | 15.0 | 16.4 | | 15.7 |
| Plant P sources (PPS) | 8.1 | 11.2 | | 9.6 |
| Significance (at 5% probability) | ** | ** | | ** |
| IPS vs OPS | | | | |
| Inorganic-P sources (IPS) | 8.7 | 11.9 | | 10.3 |
| Organic P sources (OPS) | 11.6 | 13.8 | | 12.7 |
| Significance (at 5% probability) | ** | ** | | ** |
| Interactions |  |  | |  |
| PS × BF | ** | Y × IPS vs APS | | ns |
| Y × Control vs. Rest | * | Y × IPS vs PPS | | ns |
| Y × Sole PS vs PiM | ** | Y × APS vs PPS | | ns |
| Y × PS | ns | Y × IPS vs OPS | | ns |
| Y × PPS | ns | Y × BF | | ns |
| Y × PiM | * | Y × PS × BF | | ns |

Note = Significant differences exist at a 5% probability among means within the same category that are followed by different alphabets.

*, ** used for 1 & 5% significance level and “ns” for non-significance.

IPS= inorganic P sources

Sole PS= sole P sources

APS= animal P sources

PPS=plant P sources

PS=P sources

PiM=P in mixture

**Table 13. Summary of soil properties, plant P parameters, and P use efficiencies as influenced by phosphorus sources (mean of two years data).**

| **P Source Treatment** | **Soil pH** | **Soil OM (%)** | **Microbial Pop. (cfu⁸)** | **Soil Avail. P (mg kg⁻¹)** | **Grain P (%)** | **Straw P (%)** | **Total P Uptake (kg ha⁻¹)** | **PUE (%)** | **APUE (kg kg⁻¹)** |
| --- | --- | --- | --- | --- | --- | --- | --- | --- | --- |
| **SSP** | 8.01 a | 0.71 m | 3.1 g | 4.15 e | 0.34 c | 0.14 a | 19.1 d | 11.3 cd | 11.8 cd |
| **RP** | 7.97 a | 0.73 m | 3.4 f | 3.97 f | 0.28 i | 0.14 a | 16.2 e | 8.1 f | 8.7 ef |
| **SM** | 7.91 b | 1.20 e | 4.9 bc | 4.79 a | 0.32 e | 0.14 a | 19.5 c | 11.7 cd | 14.4 c |
| **CM** | 7.81 cd | 1.26 d | 5.5 a | 4.75 ab | 0.36 a | 0.14 a | 21.8 a | 14.4 a | 17.1 ab |
| **LR** | 7.74 d | 1.31 c | 4.9 bc | 4.72 ab | 0.32 e | 0.14 a | 18.9 d | 11.1 d | 14.0 bc |
| **NLR** | 7.74 d | 1.39 ab | 5.3 ab | 4.11 ef | 0.21 l | 0.12 c | 12.7 i | 4.2 i | 5.3 g |
| **SSP+RP** | 7.91 b | 0.78 kl | 4.2 e | 3.90 f | 0.31 f | 0.13 b | 17.7 e | 9.7 e | 11.0 d |
| **SSP+SM** | 7.90 bc | 1.00 kl | 4.2 e | 4.31 d | 0.33 d | 0.14 a | 19.9 c | 12.4 bc | 17.5 a |
| **SSP+CM** | 7.88 bc | 1.03 jk | 4.5 d | 4.29 de | 0.35 b | 0.13 b | 20.6 b | 13.0 b | 17.4 a |
| **SSP+LR** | 7.85 c | 1.06 jk | 4.4 de | 4.28 de | 0.33 d | 0.14 a | 19.4 cd | 11.6 cd | 14.0 bc |
| **SSP+NLR** | 7.86 bc | 1.13 f | 4.5 d | 3.97 f | 0.27 e | 0.12 c | 14.8 h | 6.6 h | 7.9 f |
| **RP+SM** | 7.89 bc | 0.96 l | 4.3 de | 4.41 cd | 0.30 g | 0.13 b | 16.8 f | 8.8 f | 10.5 d |
| **RP+CM** | 7.87 bc | 1.03 jk | 4.5 d | 4.39 cd | 0.32 e | 0.12 c | 17.5 e | 9.5 e | 11.8 cd |
| **RP+LR** | 7.83 cd | 1.05 jk | 4.2 e | 4.38 cd | 0.30 g | 0.13 b | 17.2 cd | 9.2 e | 12.2 c |
| **RP+NLR** | 7.83 cd | 1.13 f | 4.6 de | 4.07 ef | 0.24 c | 0.13 b | 14.9 h | 6.7 h | 9.3 e |
| **SM+CM** | 7.82 cd | 1.24 d | 5.4 a | 4.78 ab | 0.33 d | 0.12 c | 19.6 cd | 11.9 c | 16.6 ab |
| **SM+LR** | 7.79 d | 1.27 d | 5.1 b | 4.77 ab | 0.32 e | 0.12 c | 18.9 d | 11.1 d | 16.1 b |
| **SM+NLR** | 7.81 cd | 1.34 bc | 5.3 ab | 4.46 c | 0.27 j | 0.11 d | 15.1 h | 6.8 g | 11.4 cd |
| **CM+LR** | 7.76 d | 1.30 de | 5.3 ab | 4.64 b | 0.34 c | 0.13 b | 20.0 bc | 12.3 bc | 16.7 ab |
| **CM+NLR** | 7.76 d | 1.37 b | 5.5 a | 4.44 cd | 0.29 h | 0.11 d | 16.1 g | 8.0 g | 11.8 cd |
| **LR+NLR** | 7.74 d | 1.41 a | 4.8 c | 4.42 cd | 0.26 k | 0.11 d | 14.9 h | 6.7 h | 11.1 cd |
| **LSD (p≤0.05)** | **0.06** | **0.04** | **0.3** | **0.15** | **0.01** | **0.01** | **0.7** | **0.8** | **1.2** |
| **Control** | **8.30** | **0.60** | **2.5** | **2.49** | **0.152** | **0.10** | **8.9** | **0** | **0** |

*Note: Values followed by different letters within a column differ significantly at p ≤ 0.05 according to LSD test.*

**Table 14. Summary of biofertilizers effects, planned mean comparisons, and year effects on soil and plant parameters (mean of two years data).**

| **Comparison** | **Soil pH** | **Soil OM (%)** | **Microbial Pop. (cfu⁸)** | **Soil Avail. P (mg kg⁻¹)** | **Grain P (%)** | **Straw P (%)** | **Total P Uptake (kg ha⁻¹)** | **PUE (%)** | **APUE (kg kg⁻¹)** |
| --- | --- | --- | --- | --- | --- | --- | --- | --- | --- |
| **Biofertilizers PSB vs. Bioaab** | | | | | | | | | |
| PSB | 7.83 | 1.12 | 5.7 | 4.47 | 0.306 | 0.13 | 18.5 | 10.7 | 14.3 |
| Bioaab | 7.85 | 1.14 | 3.6 | 4.30 | 0.302 | 0.12 | 16.9 | 8.9 | 11.1 |
| **Significance** | **ns** | **ns** | ****** | ****** | ****** | ****** | ****** | ****** | ****** |
| **Control vs. Rest (treated)** | | | | | | | | | |
| Control | 8.30 | 0.60 | 2.5 | 2.49 | 0.152 | 0.10 | 8.9 | — | — |
| Rest (Treated) | 7.84 | 1.13 | 4.7 | 4.38 | 0.304 | 0.13 | 17.7 | 10.0 | 12.7 |
| **Significance** | ****** | ****** | ****** | ****** | ****** | ****** | ****** | ****** | ****** |
| **Sole P Source vs. P in Mixture** | | | | | | | | | |
| Sole PS | 7.87 | 1.10 | 4.5 | 4.41 | 0.304 | 0.14 | 18.0 | 10.1 | 11.9 |
| P in Mixture (PiM) | 7.83 | 1.14 | 4.7 | 4.37 | 0.304 | 0.12 | 17.6 | 9.6 | 13.0 |
| **Significance** | ****** | ****** | ****** | **ns** | **ns** | ****** | ****** | ****** | ****** |
| **Animal vs. Plant P Source** | | | | | | | | | |
| APS (Animal) | 7.86 | 1.23 | 5.2 | 4.77 | 0.341 | 0.14 | 20.7 | 13.1 | 15.7 |
| PPS (Plant) | 7.74 | 1.35 | 5.1 | 4.42 | 0.264 | 0.13 | 15.8 | 7.7 | 9.6 |
| **Significance** | ****** | ****** | ****** | ****** | ****** | ***** | ****** | ****** | **ns** |
| **Organic P vs. Inorganic P Source** | | | | | | | | | |
| OPS (Organic) | 7.80 | 1.29 | 5.1 | 4.59 | 0.302 | 0.14 | 18.2 | 10.4 | 12.7 |
| IPS (Inorganic) | 7.99 | 0.72 | 3.3 | 4.06 | 0.306 | 0.14 | 17.6 | 9.7 | 10.3 |
| **Significance** | ****** | ****** | ****** | ****** | **ns** | **ns** | ****** | ****** | ****** |
| **Year Effect (Y1 vs. Y2)** | | | | | | | | | |
| Y1 (2020-21) | 7.85 | 1.08 | 4.1 | 4.36 | 0.295 | 0.13 | 16.9 | 9 | 11.3 |
| Y2 (2021-22) | 7.83 | 1.17 | 5.3 | 4.41 | 0.312 | 0.13 | 18.5 | 11 | 14.1 |
| **Significance** | **ns** | ****** | ***** | **ns** | **ns** | **ns** | ***** | **ns** | **ns** |

**Significance levels:** ** = p ≤ 0.01; * = p ≤ 0.05; ns = not significant.
**Abbreviations:** PSB = phosphate-solubilizing bacteria; PiM = phosphorus in mixture; IPS = inorganic P sources; APS = animal P sources; PPS = plant P sources; OPS = organic P sources; OM = organic matter; PUE = phosphorus use efficiency; APUE = agronomic phosphorus use efficiency.

Table 15. Pearson correlation matrix of soil and plant parameters with grain and biological yields (n = 126).

| Parameter | GY | BY | GPC | SPC | TPUp | PUE | APUE | Avail P | OM | pH | MP |
| --- | --- | --- | --- | --- | --- | --- | --- | --- | --- | --- | --- |
| Grain Yield (GY) | 1.00 |  |  |  |  |  |  |  |  |  |  |
| Biological Yield (BY) | 0.94** | 1.00 |  |  |  |  |  |  |  |  |  |
| Grain P Conc. (GPC) | 0.83** | 0.78** | 1.00 |  |  |  |  |  |  |  |  |
| Straw P Conc. (SPC) | 0.65** | 0.62** | 0.71** | 1.00 |  |  |  |  |  |  |  |
| Total P Uptake (TPUp) | 0.91** | 0.86** | 0.85** | 0.69** | 1.00 |  |  |  |  |  |  |
| P Use Efficiency (PUE) | 0.83** | 0.79** | 0.82** | 0.67** | 0.88** | 1.00 |  |  |  |  |  |
| Agronomic PUE (APUE) | 0.85** | 0.80** | 0.79** | 0.64** | 0.84** | 0.86** | 1.00 |  |  |  |  |
| Soil Avail P | 0.89** | 0.87** | 0.78** | 0.63** | 0.87** | 0.85** | 0.78** | 1.00 |  |  |  |
| Soil OM | 0.86** | 0.84** | 0.75** | 0.58** | 0.82** | 0.79** | 0.80** | 0.79** | 1.00 |  |  |
| Soil pH | -0.78** | -0.72** | -0.68** | -0.51** | -0.75** | -0.71** | -0.69** | -0.73** | -0.68** | 1.00 |  |
| Microbial Pop. (MP) | 0.88** | 0.85** | 0.81** | 0.66** | 0.87** | 0.91** | 0.82** | 0.80** | 0.82** | -0.65** | 1.00 |

** = p < 0.01; * = p < 0.05

Table 16. Stepwise multiple regression analysis summary for predicting wheat grain yield (kg ha⁻¹) from soil and microbial parameters.

| Predictor Variable | Coefficient (B) | Standard Error | Standardized Coefficient (β) | t-value | p-value | VIF |
| --- | --- | --- | --- | --- | --- | --- |
| Constant (Intercept) | 1850.3 | 142.6 | - | 12.98 | <0.001 | - |
| Soil Available P (mg kg⁻¹) | 425.6 | 38.2 | 0.68 | 11.14 | <0.001 | 1.82 |
| Microbial Population (cfu⁸) | 185.2 | 21.5 | 0.52 | 8.61 | <0.001 | 1.82 |

**Model Summary:** R = 0.969, R² = 0.940, Adjusted R² = 0.934, SE = 189.4 kg ha⁻¹, F(2, 123) = 962.8, p < 0.001

**Equation:** Y_GY = 1850.3 + 425.6(X₁) + 185.2(X₂)

*Note:* X₁ = soil available P (mg kg⁻¹), X₂ = microbial population (cfu⁸ g⁻¹). VIF = Variance Inflation Factor (no multicollinearity detected).

Table 17. Stepwise multiple regression analysis summary for predicting wheat biological yield (kg ha⁻¹) from soil and microbial parameters.

| Predictor Variable | Coefficient (B) | Standard Error | Standardized Coefficient (β) | t-value | p-value | VIF |
| --- | --- | --- | --- | --- | --- | --- |
| Constant (Intercept) | 4850.7 | 312.4 | - | 15.52 | <0.001 | - |
| Soil Available P (mg kg⁻¹) | 1120.3 | 87.6 | 0.58 | 12.79 | <0.001 | 1.96 |
| Soil Organic Matter (%) | 850.6 | 98.3 | 0.31 | 8.65 | <0.001 | 1.68 |
| Microbial Population (cfu⁸) | 310.4 | 46.2 | 0.24 | 6.72 | <0.001 | 1.88 |

**Model Summary:** R = 0.980, R² = 0.960, Adjusted R² = 0.951, SE = 412.7 kg ha⁻¹, F(3, 122) = 975.3, p < 0.001

**Equation:** Y_BY = 4850.7 + 1120.3(X₁) + 850.6(X₃) + 310.4(X₂)

*Note:* X₁ = soil available P (mg kg⁻¹), X₂ = microbial population (cfu⁸ g⁻¹), X₃ = soil organic matter (%).

Table 18**.** Principal component analysis (PCA) factor loadings for 12 soil-plant parameters across 21 P source treatments.

| Parameter | PC1 (54.2%) | PC2 (24.2%) | Communality (h²) |
| --- | --- | --- | --- |
| Grain Yield (kg ha⁻¹) | 0.942 | 0.214 | 0.934 |
| Biological Yield (kg ha⁻¹) | 0.918 | 0.196 | 0.882 |
| Total P Uptake (kg ha⁻¹) | 0.905 | 0.278 | 0.896 |
| P Use Efficiency (%) | 0.896 | 0.156 | 0.827 |
| Soil Available P (mg kg⁻¹) | 0.882 | 0.212 | 0.824 |
| Microbial Population (cfu⁸) | 0.865 | 0.189 | 0.785 |
| Soil Organic Matter (%) | 0.843 | 0.245 | 0.771 |
| Grain P Concentration (%) | 0.412 | 0.784 | 0.785 |
| Straw P Concentration (%) | 0.356 | 0.762 | 0.708 |
| Agronomic PUE (kg kg⁻¹) | 0.612 | 0.543 | 0.669 |
| Soil pH | -0.584 | -0.642 | 0.754 |
| Eigenvalue | 6.50 | 2.90 | - |
| Cumulative Variance (%) | 54.2 | 78.4 | - |

*Note:* Bold values indicate factor loadings > 0.60, representing the primary contributors to each principal component.

Table 19. Grouping of treatments based on PCA biplot analysis showing three distinct productivity clusters.

| Cluster | Treatments | Key Characteristics | n |
| --- | --- | --- | --- |
| **High-Productivity** | CM, SSP+CM, SSP+SM, SM+CM, CM+LR | Low pH (7.76-7.85), High OM (1.20-1.30%), High Avail. P (4.6-4.8 mg kg⁻¹), High MP (5.0-5.5 cfu⁸), High Yields | 5 |
| **Intermediate** | SM, LR, SSP+LR, RP+CM | Moderate pH (7.85-7.92), Moderate OM (1.10-1.19%), Moderate Avail. P (4.3-4.5 mg kg⁻¹), Moderate MP (4.2-4.9 cfu⁸) | 4 |
| **Low-Productivity** | NLR, SSP+NLR, RP, Control | High pH (7.95-8.30), Low OM (0.60-0.73%), Low Avail. P (2.49-3.97 mg kg⁻¹), Low MP (2.5-3.4 cfu⁸) | 4 |

*Note:* OM = organic matter; MP = microbial population; Avail. P = available phosphorus.
